# Supplementary material
Source: PubMed Central journal article supplement (PMC166419)

**A)**

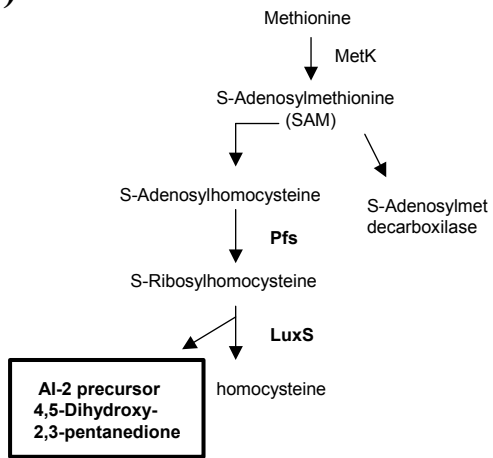

**B)**

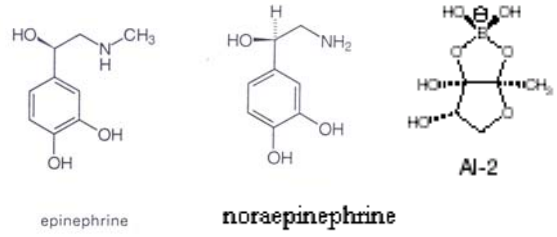

Supplement: pnas_1537100100_4.pdf [file pnas_1537100100_4.pdf]

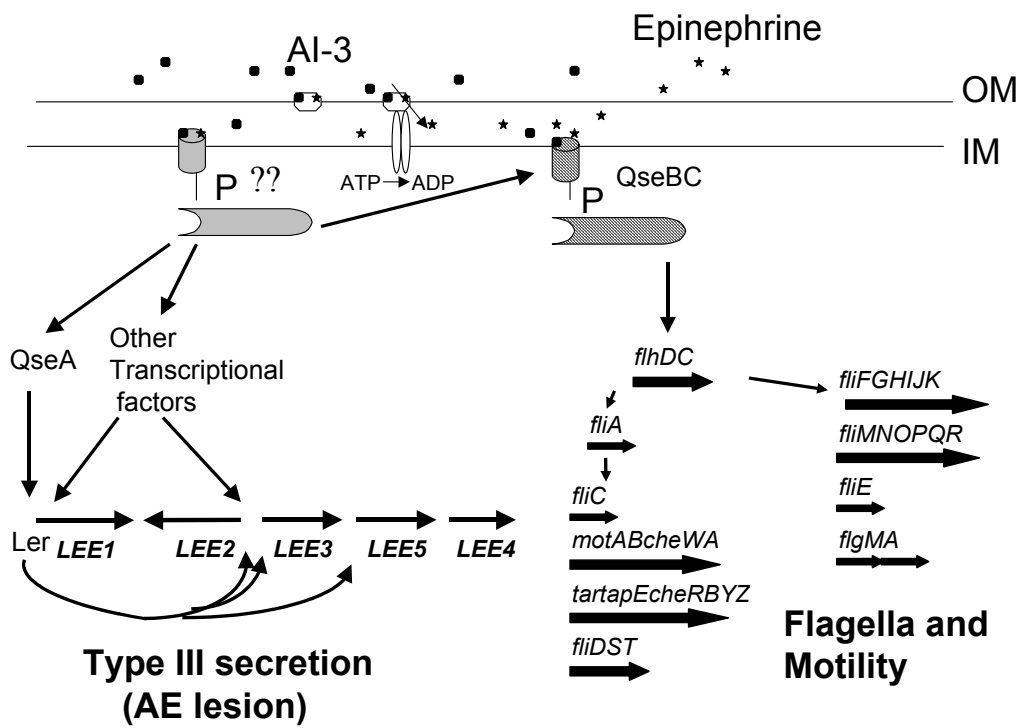

Supplement: pnas_1537100100_6.pdf [file pnas_1537100100_6.pdf]
